# Supplementary material
Source: Frontiers journal article supplement (https://www.frontiersin.org/articles/505739)
Supplement: Image_1.pdf [file Image_1.pdf]

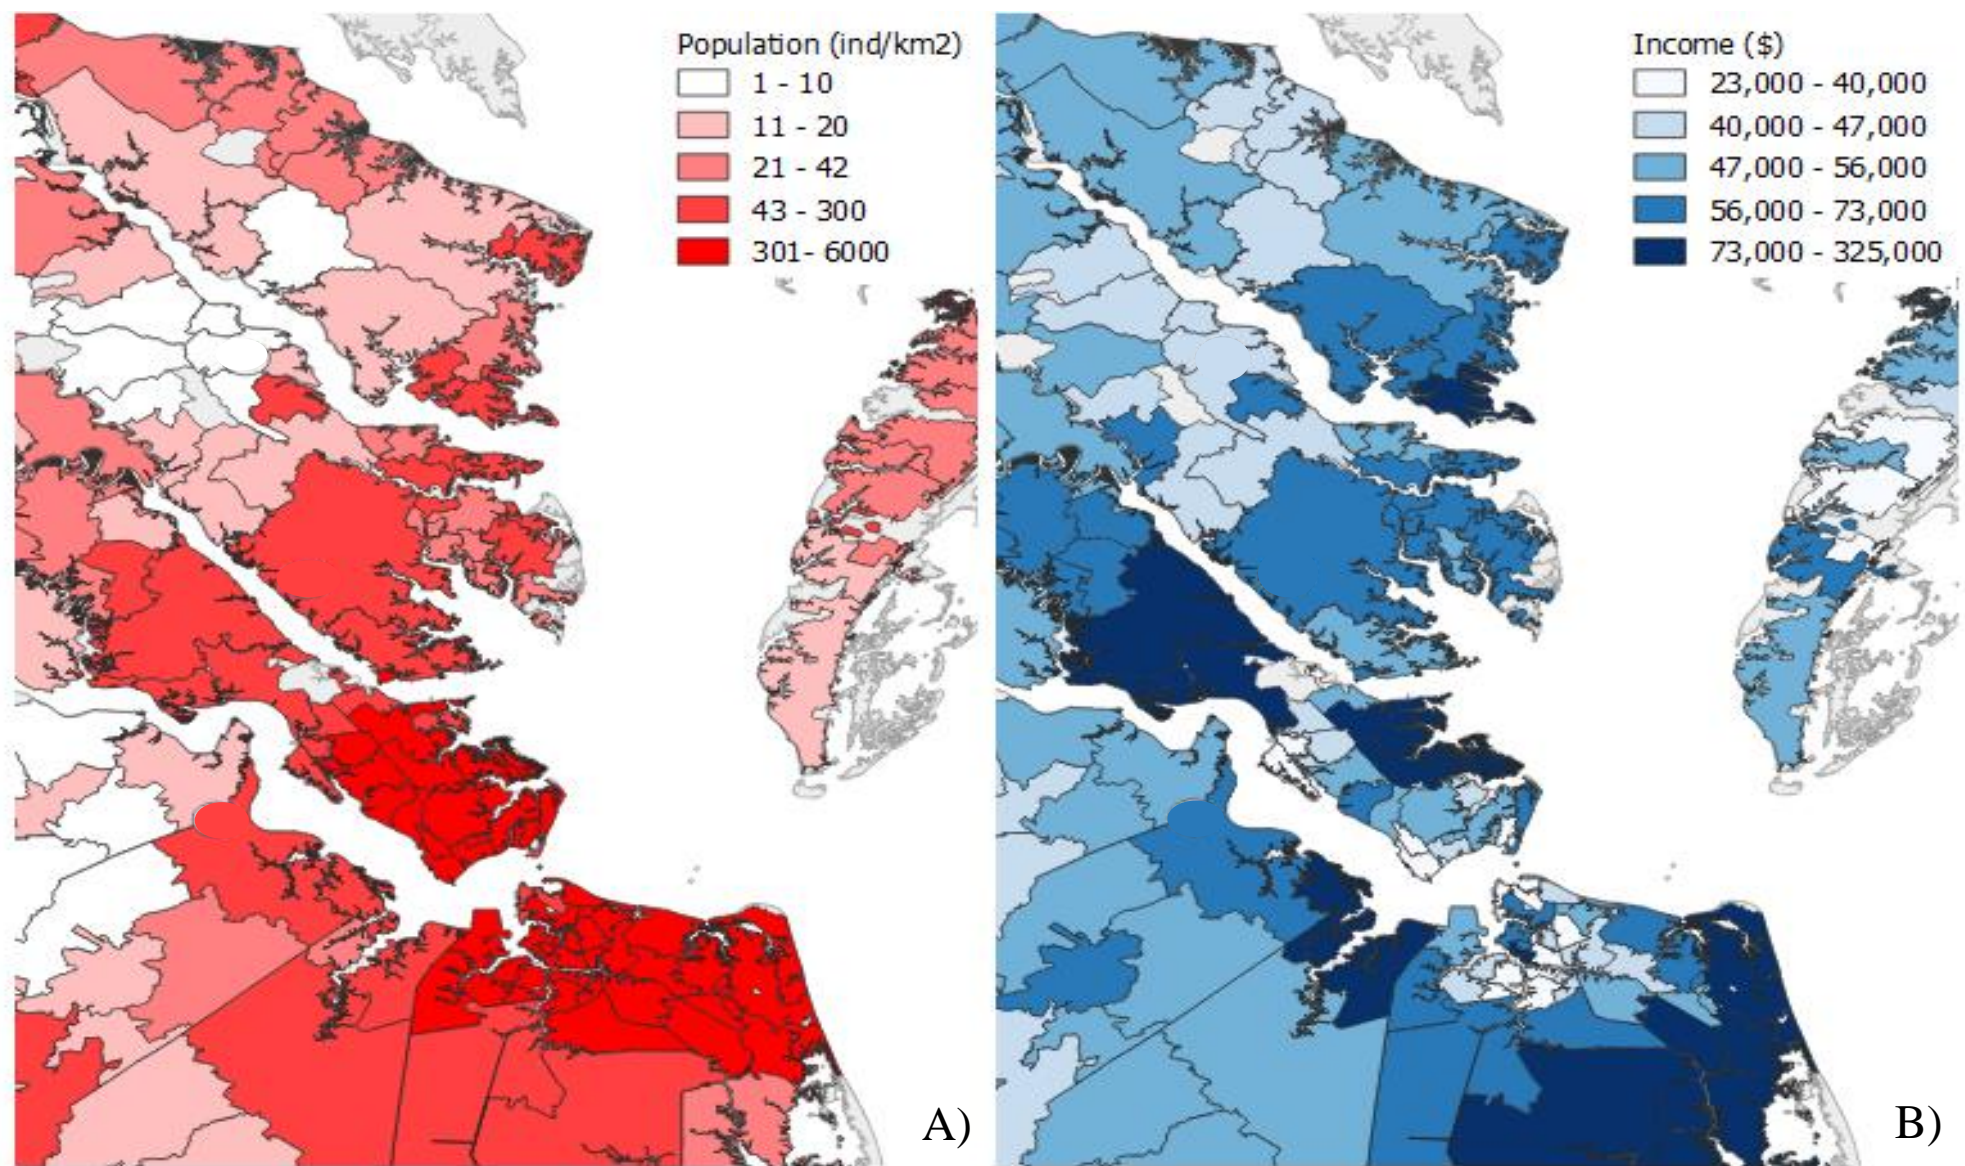

**Supplementary Figure S1.** Average population density (A) and average adjusted gross income (B) per ZIP code for the 2006-2016 period.
