# Supplementary material
Source: Frontiers journal article supplement (https://www.frontiersin.org/articles/505739)
Supplement: Table_1.pdf [file Table_1.pdf]

**Supplementary Table S1.** Results of the mixed effects model estimating annual lease use and productivity per systems with random effects for leases nested within leaseholder. Marginal and conditional coefficients of determination are respectively given by  $R^2_m$  and  $R^2_c$ .

| Random effects | Y= use (1 0) |           | Y=ln(productivity) |           |
|----------------|--------------|-----------|--------------------|-----------|
|                | Variance     | Std. Dev. | Variance           | Std. Dev. |
| Lease          | 2.649        | 1.627     | 1.145              | 1.070     |
| Leaseholder    | 4.824        | 2.196     | 0.959              | 0.979     |
| $R^2_m$        | 0.053        |           | 0.089              |           |
| $R^2_c$        | 0.591        |           | 0.627              |           |
