# Supplementary material
Source: Frontiers journal article supplement (https://www.frontiersin.org/articles/505739)
Supplement: Table_2.pdf [file Table_2.pdf]

**Supplementary Table S2.** Results of the mixed effects model estimating annual lease use and productivity per systems including two new dummy variables to represent harvest in the first three years of a lease. Base level of system for interaction terms is miscellaneous tributaries. Significance is denoted by:  $p < 0.001 = \text{'***'}$ ,  $p < 0.01 = \text{'**'}$ ,  $p < 0.05 = \text{'*'}$ ,  $p < 0.1 = \text{'.'}$ .

| Fixed effects                        | Y= use (1 0) |            |         |         | Y=ln(productivity) |            |         |         |
|--------------------------------------|--------------|------------|---------|---------|--------------------|------------|---------|---------|
|                                      | Estimate     | Std. Error | p-value | Signif. | Estimate           | Std. Error | p-value | Signif. |
| Year                                 | 0.242        | 0.017      | < 2E-16 | ***     | 0.056              | 0.020      | 0.005   | **      |
| Lease age                            | -6.3E-4      | 0.005      | 0.902   |         | -0.004             | 0.005      | 0.428   |         |
| lease_with_harvest_less3yr           | 3.402        | 0.340      | <2E-16  | ***     | -0.535             | 0.239      | 0.025   | *       |
| lease_with_Extensive_harvest_less3yr | -1.269       | 0.389      | 0.001   | **      | 0.573              | 0.275      | 0.0368  | *       |
| Year x Potomac                       | 0.069        | 0.032      | 0.028   | *       | 0.091              | 0.036      | 0.012   | *       |
| Year x Rappahannock                  | -0.014       | 0.033      | 0.680   |         | -0.030             | 0.039      | 0.450   |         |
| Year x York                          | 0.038        | 0.048      | 0.429   |         | -0.092             | 0.061      | 0.131   |         |
| Year x James                         | -0.143       | 0.031      | 4.03E-6 | ***     | 0.103              | 0.032      | 0.001   | **      |
| Year x Ches. Bay                     | -0.059       | 0.031      | 0.059   | .       | 0.076              | 0.035      | 0.029   | *       |
| Aquaculture type                     |              |            |         |         | 0.057              | 0.096      | 0.552   |         |
